# Supplementary material
Source: HighWire-hosted journal article supplement (http://www.cmaj.ca/highwire/filestream/59191/field_highwire_adjunct_files/7/screen-wong-7-at.pdf)

**Appendix 7 (as submitted by the authors): Result of sensitivity analyses: tornado diagrams: “screen and treat” vs. “no screening”**

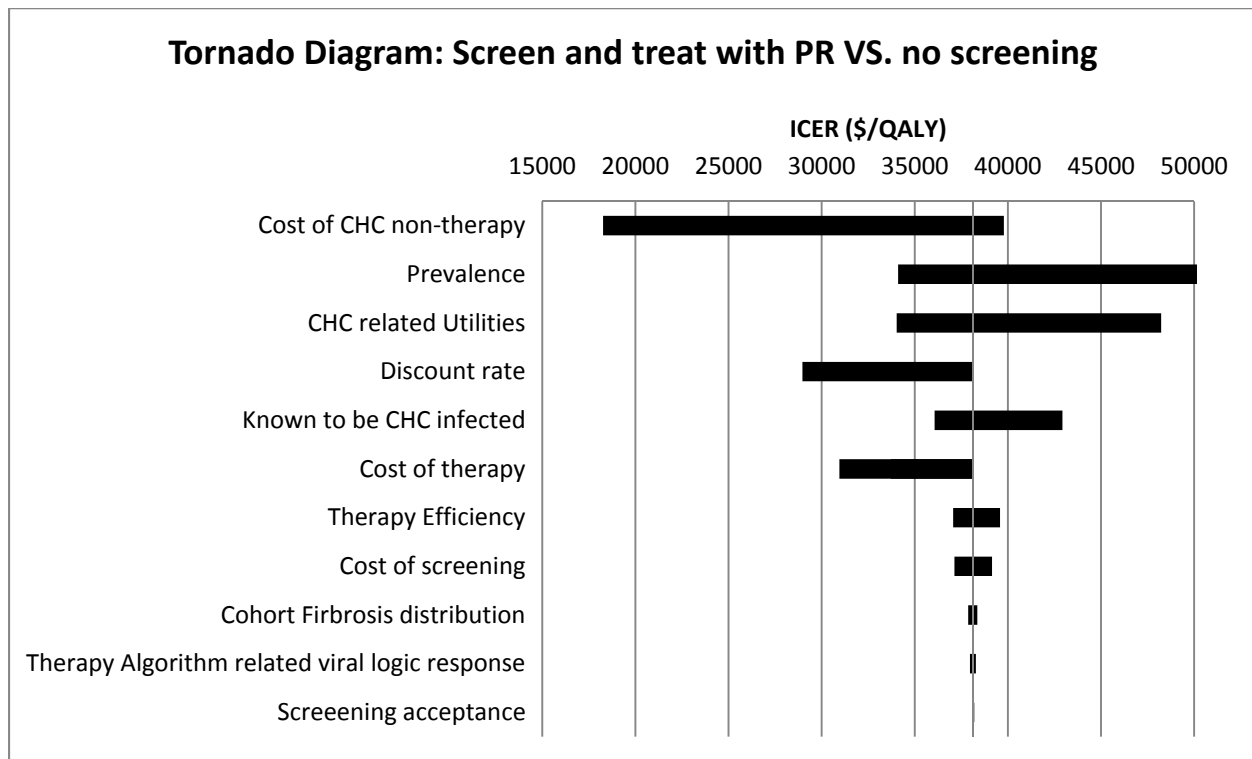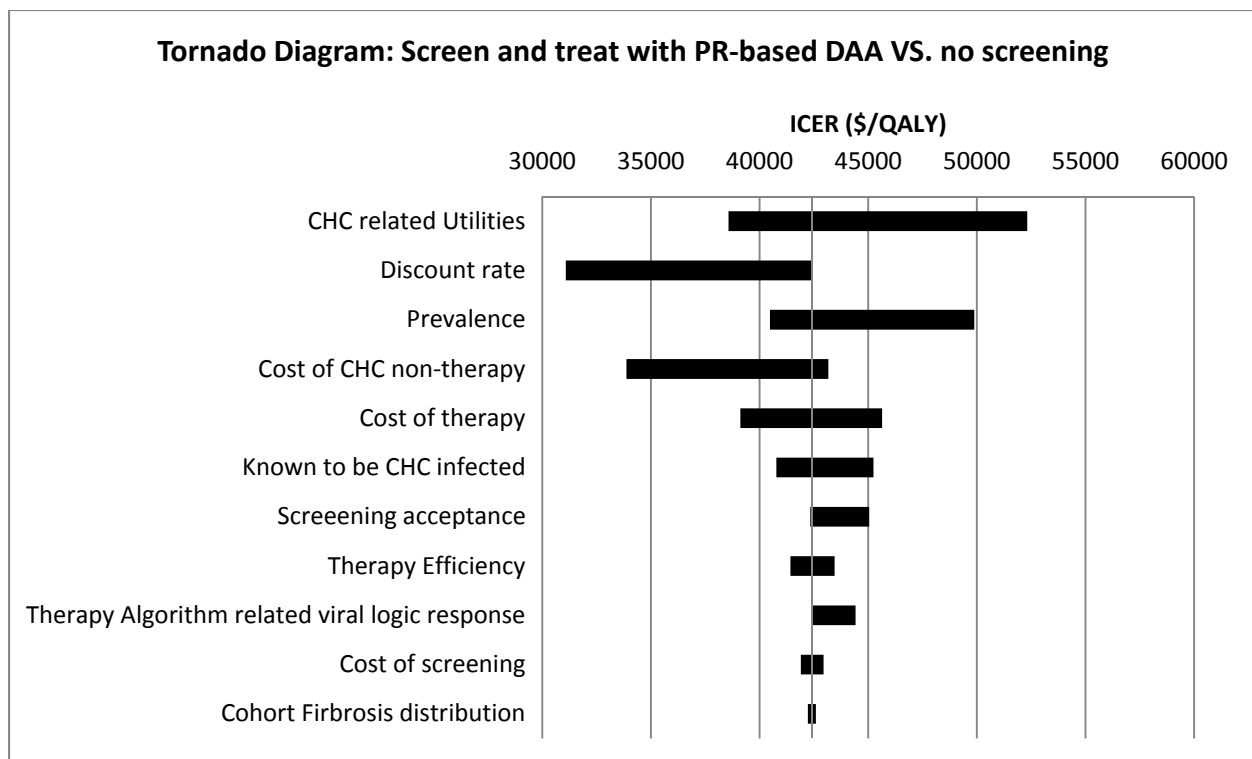

Tornado Diagram: Screen and treat with IFN-Free DAA VS. no screening

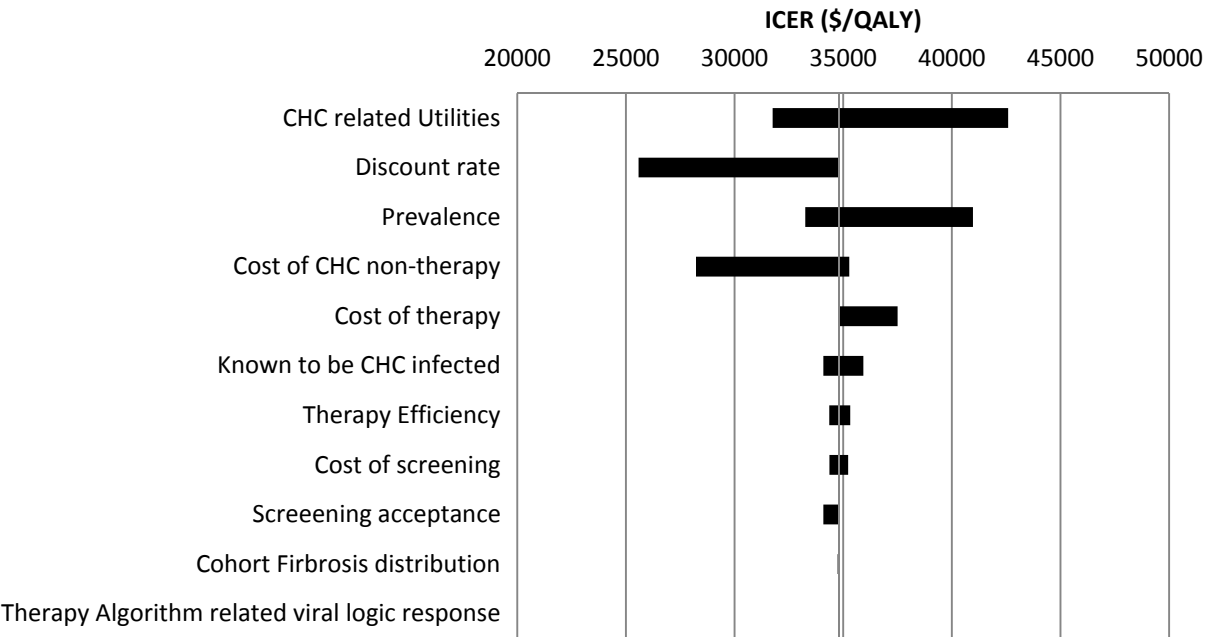

Supplement: screen-wong-7-at.pdf [file screen-wong-7-at.pdf]
